# Supplementary material for: The ADP-Heptose Biosynthesis Enzyme GmhB is a Conserved Gram-Negative Bacteremia Fitness Factor
Source: PubMed Central journal article supplement (PMC9302095; doi:10.1128/iai.00224-22), 2022-06-28
Supplement: iai.00224-22-s0002.pdf [file iai.00224-22-s0002.pdf]

## SUPPLEMENTAL FIGURES

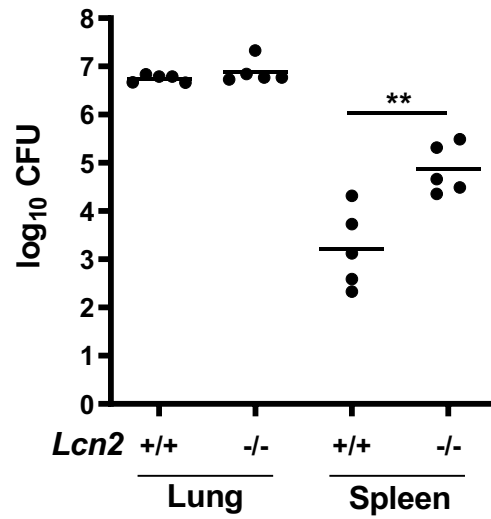

**Supplemental Figure 1: Lipocalin 2 restricts *K. pneumoniae* lung dissemination.** To model pneumonia,  $1 \times 10^6$  CFU of a library of *K. pneumoniae* transposon mutants was administered retropharyngeally to *Lcn2*<sup>+/+</sup> or *Lcn2*<sup>-/-</sup> mice. Mean log<sub>10</sub> CFU is displayed for each organ at 24 hours post infection. \*\*p<0.001 by unpaired t test. For each group, n=5 mice.

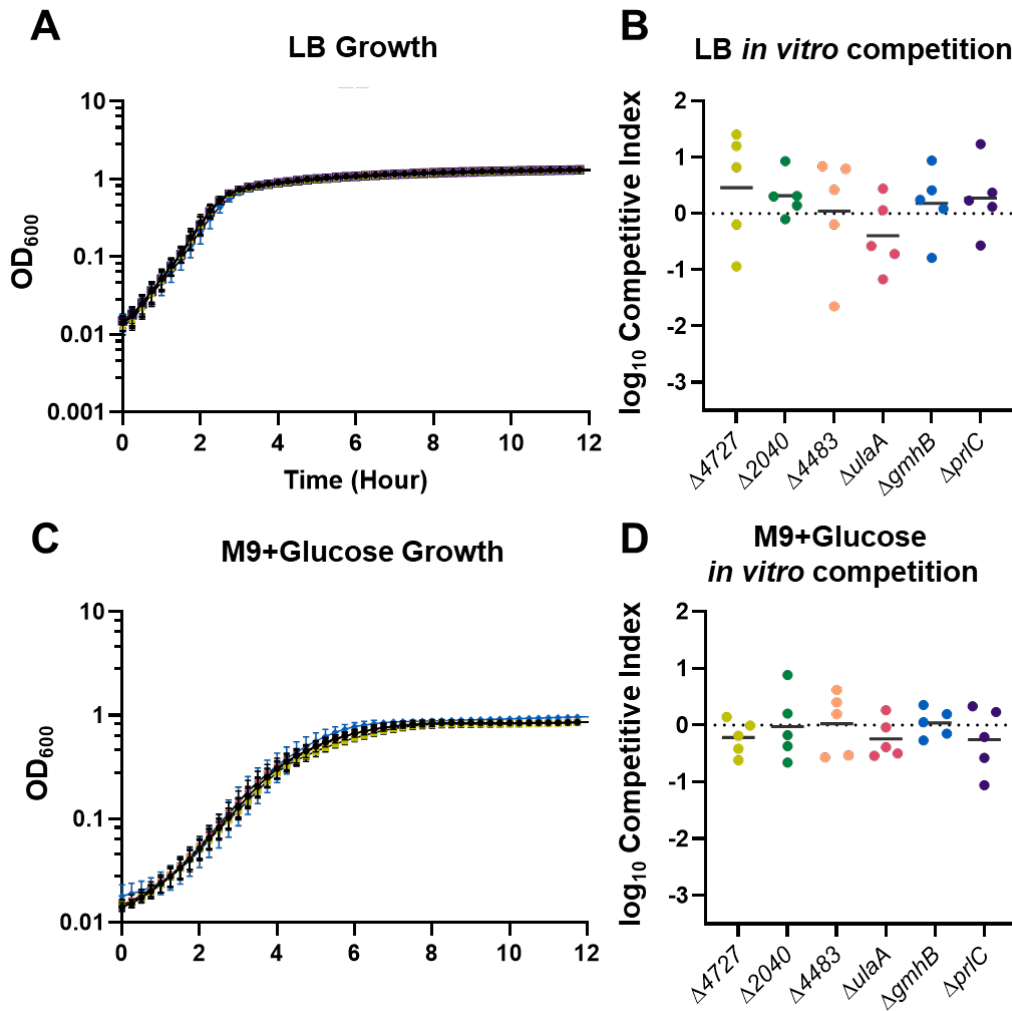

**Supplemental Figure 2.** GmhB and other factors of interest are not required for *K. pneumoniae* replication *in vitro*. KPPR1 or isogenic knockouts were inoculated to a starting concentration of  $1 \times 10^7$  CFU/mL and monitored by optical density (OD<sub>600</sub>) in LB (A) and M9 with 0.9% glucose (M9+Glucose; C). KPPR1 and each mutant were combined 1:1 at a concentration of  $1 \times 10^6$  CFU/mL and incubated in LB (B) or M9+Glucose (D) and mean log<sub>10</sub> competitive index compared to wild-type at 24 hours post inoculation is displayed (n=5). One-way ANOVA indicated no significant difference between strains for area under the curve after growth and one-sample t tests with a hypothetical value of zero showed no defect in competitive indices; for A and C, lines colors correspond to strains in B and D.

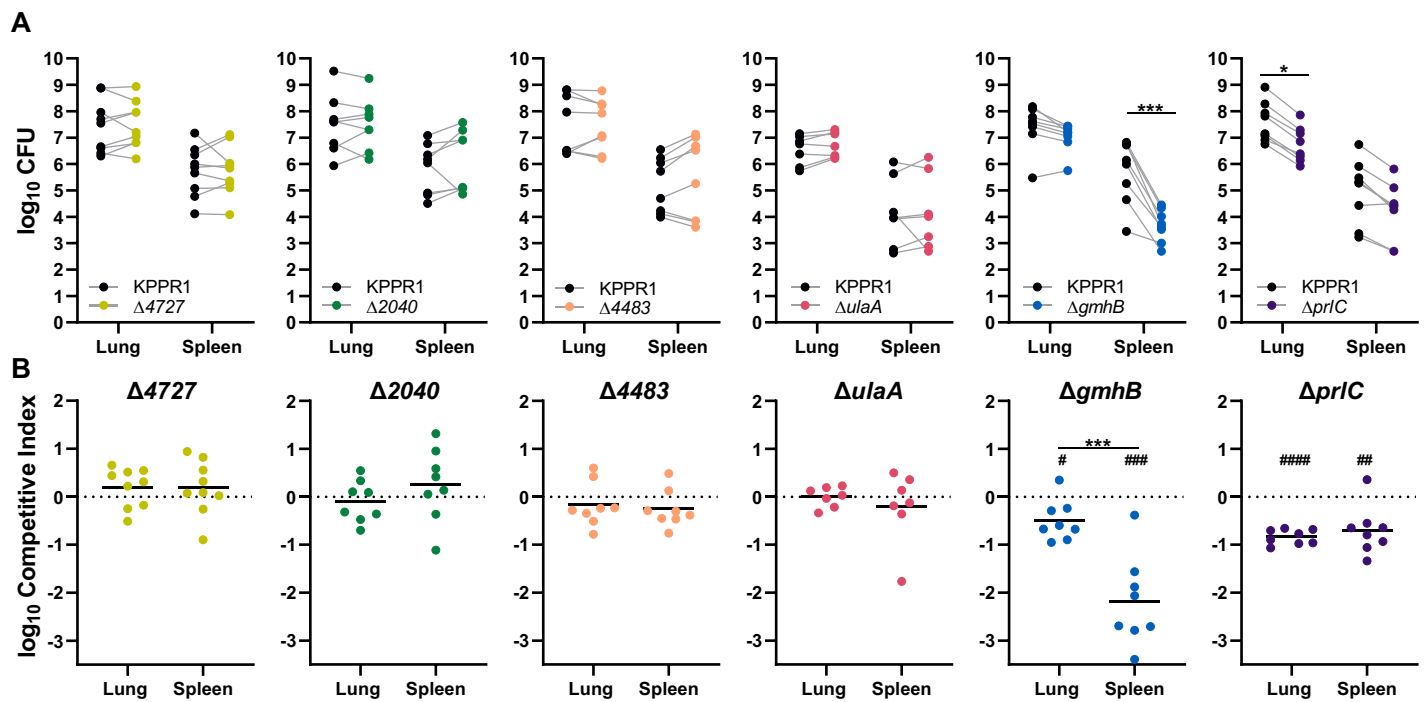

**Supplemental Figure 3. Summary for *in vivo* validation of transposon insertion site sequencing**

(InSeq). Bacterial burden per organ from mice 24 hours after inoculation with 1:1 mixture of isogenic knockouts and KPPR1 ( $1 \times 10^6$  CFU total) administered in the pharynx of *Lcn2*<sup>-/-</sup> mice is shown (A), corresponding to the competitive indices in (B). \* $p < 0.05$ , \*\*\* $p < 0.001$  by unpaired t test; # $p < 0.05$ , ## $p < 0.01$ , ### $p < 0.001$ , #### $p < 0.0001$  by one sample t test with a hypothetical value of zero. For each group,  $n \geq 7$  mice in at least two independent infections. All statistical tests were performed on log-transformed data. For each group,  $n \geq 7$  mice across at least two independent infections.

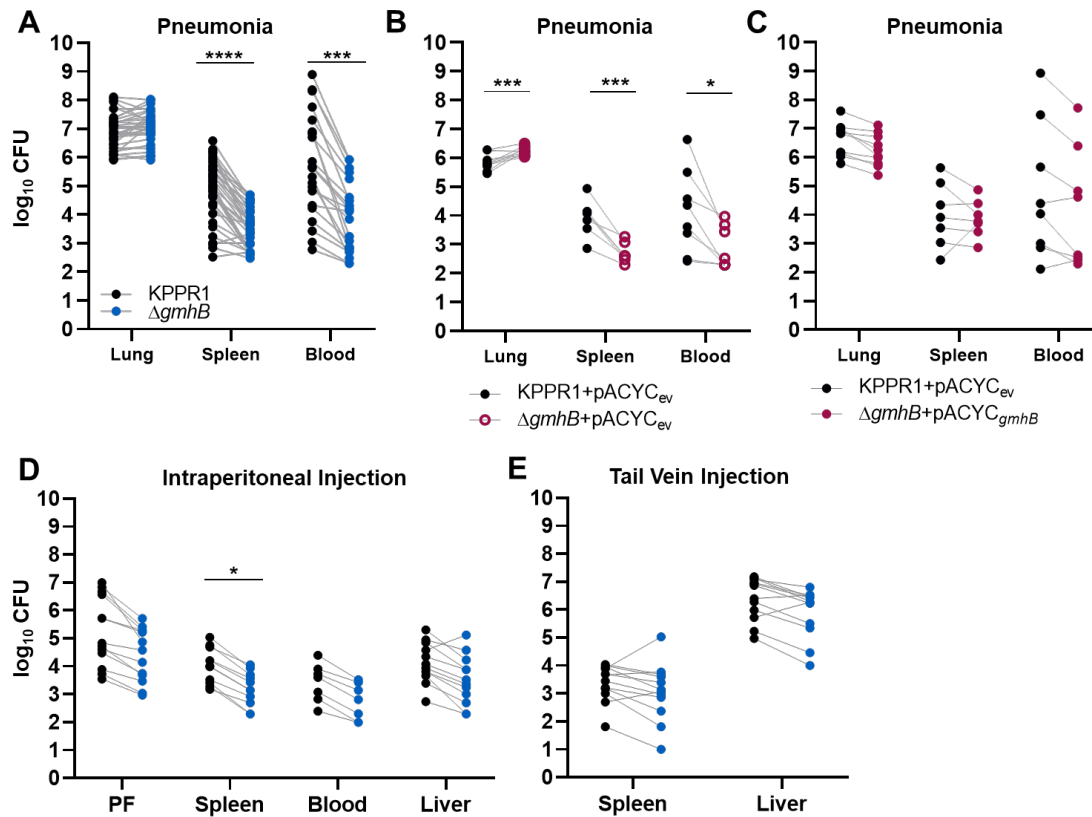

**Supplemental Figure 4. Bacterial burden summary for models of murine bacteremia.** In a model of bacteremic pneumonia, mice were retropharyngeally inoculated with  $1 \times 10^6$  CFU *K. pneumoniae* (A-C). To initiate dissemination from a lung-independent site,  $1 \times 10^3$  CFU was administered to the intraperitoneal cavity (D). For modeling direct bacteremia requiring no dissemination,  $1 \times 10^5$  CFU was administered via tail vein injection (E). The 1:1 inoculum consisted of KPPR1: $\Delta gmhB$  (A, D, E), KPPR1: $\Delta gmhB$  carrying empty pACYC vector (ev; B), or KPPR1<sub>ev</sub>: $\Delta gmhB$  with *gmhB* complementation provided on pACYC under control of the native *gmhB* promoter ( $\Delta gmhB$ +pACYC<sub>gmhB</sub>; C). Log<sub>10</sub> CFU burden for each site at 24 hours post infection is displayed, corresponding to competitive indices in Figure 1. \* $p < 0.05$ , \*\* $p < 0.01$ , \*\*\* $p < 0.001$ , \*\*\*\* $p < 0.0001$  by unpaired t test. For each group,  $n \geq 7$  mice in at least two independent infections.

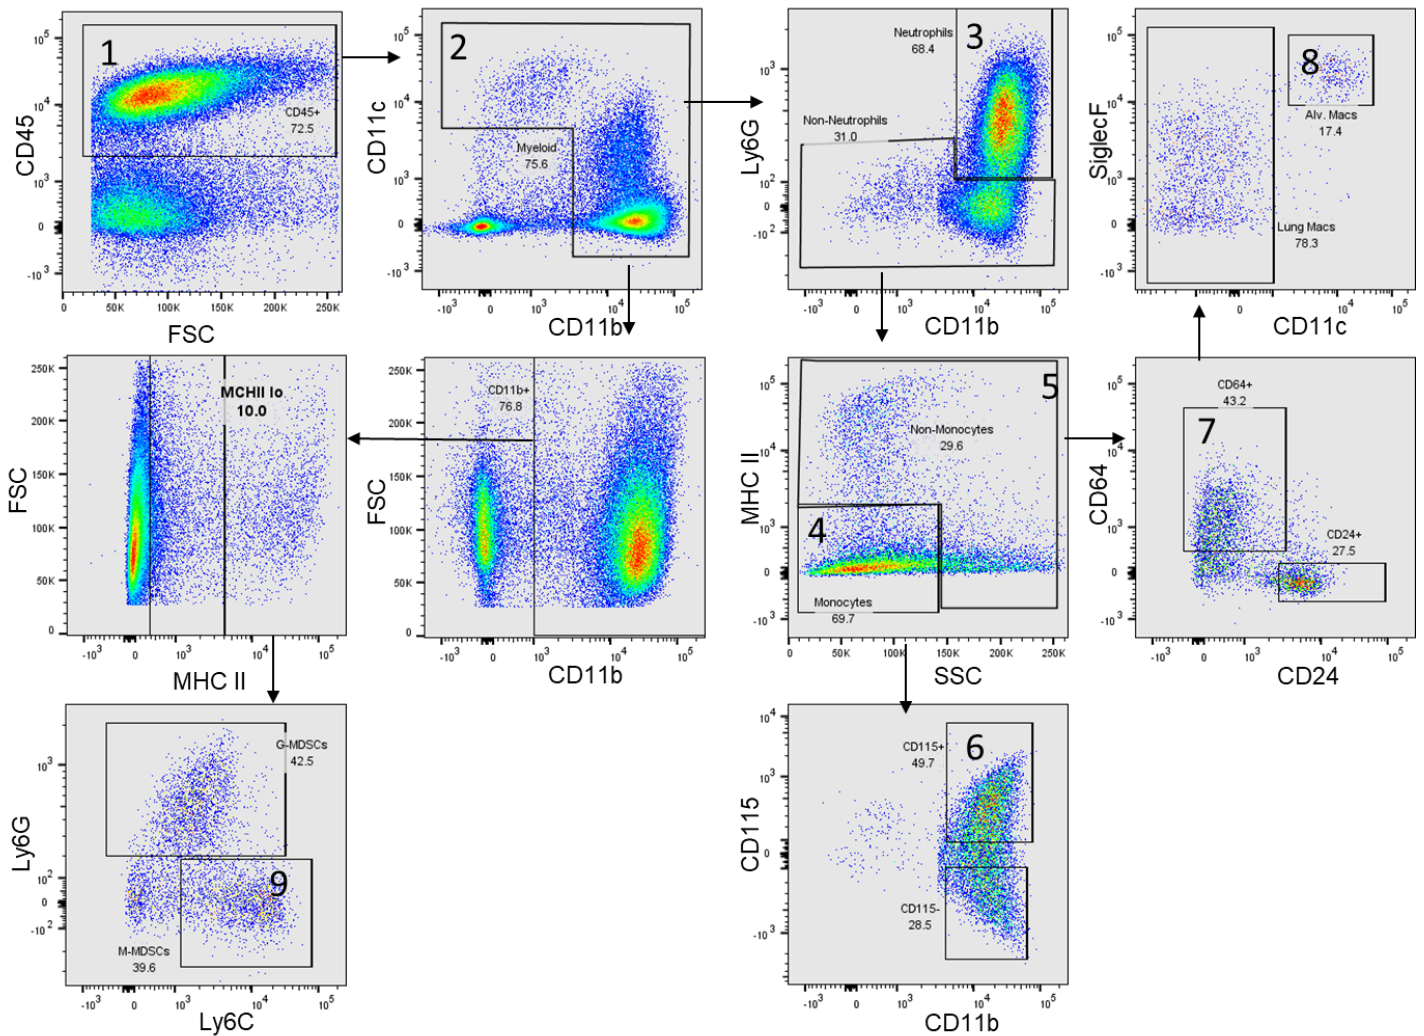

**Supplemental Figure 5. Gating Scheme for flow cytometry experiments.** Single cell suspensions were generated from collagenase digested lungs as described. Following this, cell viability was assessed via trypan blue exclusion and was >90% for all samples. Cells were subsequently gated as follows: CD45<sup>+</sup> (Gate 1), myeloid lineage cells: CD11b/c<sup>+</sup> (Gate 2), neutrophils: Ly6G<sup>+</sup> (Gate 3), putative monocytes: MHCII<sup>lo</sup>, SSC<sup>lo</sup> (Gate 4) or macrophage and DCs: MHCII<sup>+/-</sup> SSC<sup>hi</sup> (Gate 5), CD115<sup>+</sup> Monocytes (Gate 6), macrophages: CD64<sup>+</sup>, CD24<sup>-</sup> (Gate 7), alveolar macrophages: SiglecF<sup>+</sup>, CD11c<sup>+</sup> (Gate 8). M-MDSCs: CD11b<sup>+</sup>, MCH<sup>lo</sup>, Ly6G<sup>-</sup>, Ly6C<sup>+</sup> (Gate 9).

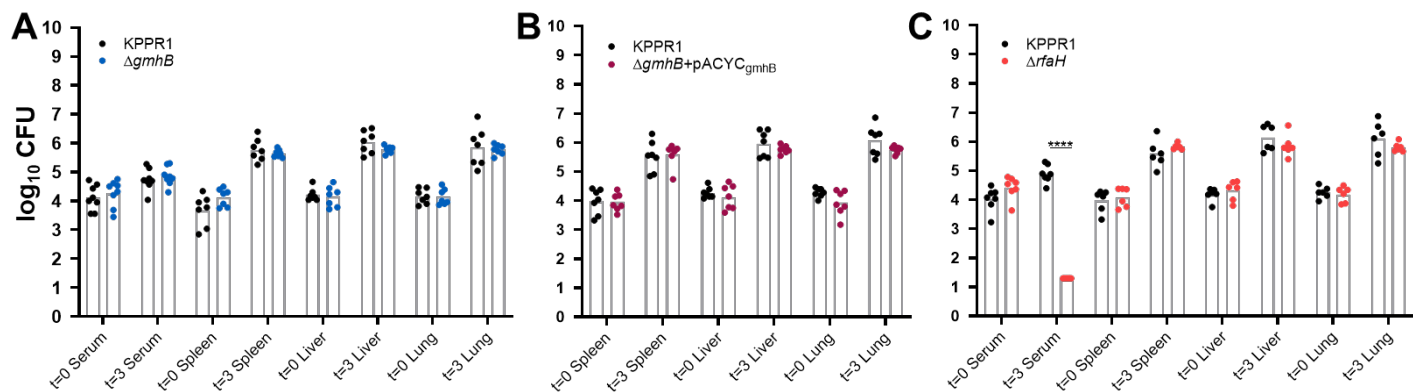

**Supplemental Figure 6. Bacterial counts from *ex vivo* killing assays.** *Ex vivo* competition assays were performed in human serum and uninfected murine spleen, liver, or lung homogenate using 1:1 mixture of KPPR1 and either  $\Delta gmhB$  (A),  $\Delta gmhB + pACYC_{gmhB}$  (B), or  $\Delta rfaH$  (C). Log<sub>10</sub> recovered CFU following 0 hours (t=0) and three hours (t=3) of incubation in specified condition is displayed, corresponding to competitive indices in Figures 3 and 4. \*\*\*\*p<0.0001 by unpaired t test, for each group, n≥7.

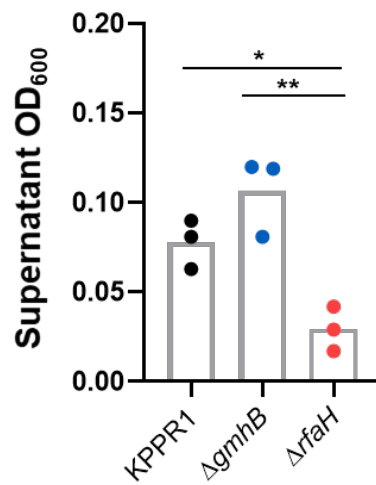

**Supplemental Figure 7. GmhB does not alter hypermucoviscosity.** To assess hypermucoviscosity, overnight cultures were pelleted at 5,000xg for 15 minutes and adjusted to an OD<sub>600</sub>=1 in 1mL PBS. Normalized PBS suspensions were subsequently centrifuged at 1,000xg for 5 minutes and the OD<sub>600</sub> of the upper 900μL of supernatant was measured from three biological replicates.

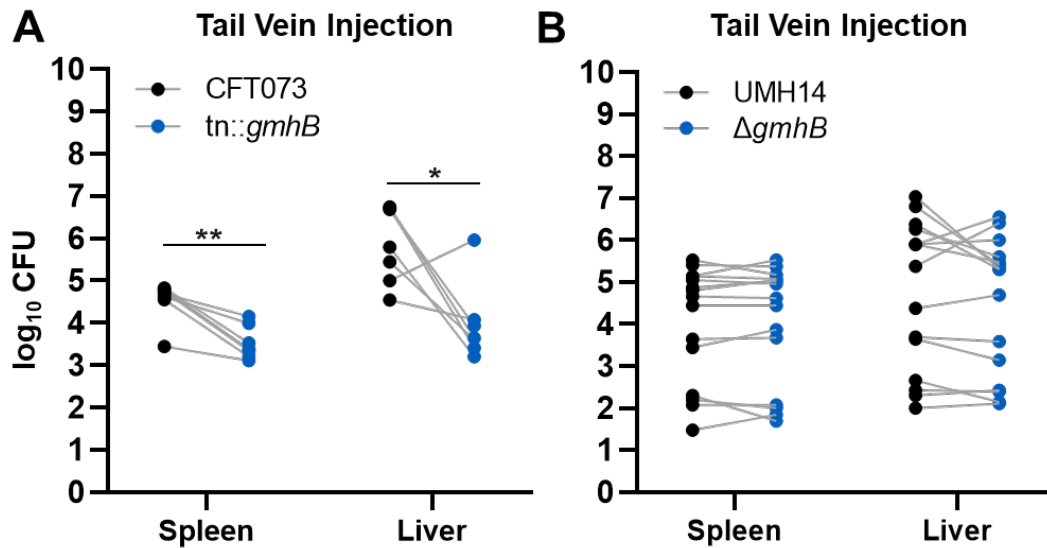

**Supplemental Figure 8. Bacterial burden summary for direct bacteremia with *E. coli* and *C. freundii*.**

In a model of direct bacteremia,  $1 \times 10^7$  CFU of *E. coli* CFT073 mixed 1:1 with CFT073:*tn::gmhB* (A) or *C. freundii* UMH14 mixed 1:2 with UMH14: $\Delta gmhB$  (B) was administered via tail vein injection. Log<sub>10</sub> CFU burden for each site at 24 hours post infection is displayed, corresponding to competitive indices in Figure 6. \* $p < 0.05$ , \*\* $p < 0.01$  by unpaired t test. For each group,  $n \geq 7$  mice in at least two independent infections.



## SUPPLEMENTAL TABLES

**Supplemental Table 1.** Factors identified by transposon insertion site sequencing (InSeq) for involvement in late phases of *K. pneumoniae* bacteremia.

| Locus ID<br>(VK055_#) | Gene<br>Name  | Input: <i>Lcn2</i> <sup>+/+</sup> |             | <i>Lcn2</i> <sup>+/+</sup> : <i>Lcn2</i> <sup>-/-</sup> |             | <i>Lcn2</i> <sup>-/-</sup> |          | GenBank Definition                                                                                                                                         |
|-----------------------|---------------|-----------------------------------|-------------|---------------------------------------------------------|-------------|----------------------------|----------|------------------------------------------------------------------------------------------------------------------------------------------------------------|
|                       |               | Lung                              |             | Lung                                                    |             | Lung:Spleen                |          |                                                                                                                                                            |
|                       |               | log <sub>10</sub><br>ratio        | q-<br>value | log <sub>10</sub><br>ratio                              | q-<br>value | log <sub>10</sub><br>ratio | q-value  |                                                                                                                                                            |
| 3924                  |               | 0.978                             | 1.000       | 0.876                                                   | 0.221       | 25.500                     | 1.84E-73 | putative glycosylase                                                                                                                                       |
| 3792                  |               | 1.138                             | 0.160       | 0.872                                                   | 0.137       | 25.467                     | 1.45E-91 | bacterial transferase hexapeptide<br>family protein                                                                                                        |
| 4727                  |               | 1.175                             | 0.103       | 0.882                                                   | 0.257       | 20.333                     | 5.02E-70 | ethanolamine ammonia-lyase,<br>putative regulatory subunit                                                                                                 |
| 2040                  |               | 1.054                             | 1.000       | 1.083                                                   | 0.883       | 20.000                     | 7.62E-28 | branched-chain amino acid transport<br>system/permease component family<br>protein                                                                         |
| 4483                  |               | 1.011                             | 1.000       | 1.022                                                   | 1.000       | 16.909                     | 3.66E-41 | putative adhesin                                                                                                                                           |
| 2877                  | ulaA          | 0.979                             | 1.000       | 1.043                                                   | 0.858       | 16.556                     | 1.52E-97 | PTS ascorbate-specific subunit                                                                                                                             |
| 2352                  | yaeD,<br>gmhB | 0.629                             | 0.191       | 0.714                                                   | 0.275       | 16.333                     | 3.09E-11 | D,D-heptose 1,7-bisphosphate<br>phosphatase                                                                                                                |
| 3607                  | prlC          | 1.096                             | 0.680       | 1.019                                                   | 1.000       | 14.000                     | 1.52E-32 | oligopeptidase A                                                                                                                                           |
| 1436                  |               | 0.752                             | 0.053       | 1.051                                                   | 1.000       | 13.800                     | 4.01E-29 | bifunctional enzyme and<br>transcriptional regulator PutA<br>transcriptional repressor, Proline<br>dehydrogenase/pyrroline-5-<br>carboxylate dehydrogenase |
| 1606                  |               | 0.918                             | 0.941       | 0.825                                                   | 0.371       | 12.875                     | 1.77E-21 | alpha-L-glutamate ligase, RimK family<br>protein                                                                                                           |

|      |      |       |       |       |       |        |           |                                                                                                |
|------|------|-------|-------|-------|-------|--------|-----------|------------------------------------------------------------------------------------------------|
| 4287 | ptsP | 0.976 | 1.000 | 1.092 | 0.268 | 12.419 | 4.21E-107 | phosphoenolpyruvate-protein<br>phosphotransferase                                              |
| 785  | gcvA | 0.727 | 0.191 | 0.767 | 0.222 | 12.286 | 8.48E-18  | gcvA transcriptional dual regulator                                                            |
| 4167 | ubiX | 1.084 | 0.611 | 0.937 | 0.784 | 12.048 | 1.49E-50  | 3-octaprenyl-4-hydroxybenzoate<br>decarboxylase together with UbiG;<br>flavy prenyltransferase |
| 2933 |      | 1.171 | 0.074 | 0.997 | 1.000 | 11.926 | 6.05E-64  | amino acid permease family protein;<br>efflux transporter                                      |
| 2659 | hpaB | 1.175 | 0.205 | 0.910 | 0.626 | 11.824 | 4.37E-40  | 4-hydroxyphenylacetate 3-<br>monooxygenase, oxygenase<br>component                             |
| 2390 | dgt  | 1.025 | 1.000 | 1.063 | 0.745 | 11.538 | 5.90E-59  | deoxyguanosinetriphosphate<br>triphosphohydrolase                                              |
| 1770 | pnuC | 0.933 | 0.806 | 0.907 | 0.573 | 10.750 | 2.02E-41  | nicotinamide mononucleotide<br>transporter PnuC family protein                                 |
| 1674 | exuT | 0.884 | 0.698 | 0.905 | 0.819 | 10.500 | 1.82E-20  | exuT hexuronate MFS transporter                                                                |

**Supplemental Table 2. Strains and plasmids used in this study.**

| Species                      | Strain                                                          | Modification                                                                                            | Reference (PMID) |
|------------------------------|-----------------------------------------------------------------|---------------------------------------------------------------------------------------------------------|------------------|
| <i>Klebsiella pneumoniae</i> | KPPR1                                                           | -                                                                                                       | 25291761         |
| <i>Klebsiella pneumoniae</i> | KPPR1 pKD46                                                     | KPPR1 carrying the pKD46 plasmid                                                                        |                  |
| <i>Klebsiella pneumoniae</i> | KPPR1 - $\Delta$ <i>gmhB</i>                                    | KPPR1 with kanamycin resistance gene from pKD4 replacing the <i>gmhB</i> open reading frame             | This study       |
| <i>Klebsiella pneumoniae</i> | KPPR1 - $\Delta$ <i>gmhB</i> +pACYC <sub>C<sub>gmhB</sub></sub> | $\Delta$ <i>gmhB</i> with <i>in trans</i> complementation of GmhB via pACYC <sub>C<sub>gmhB</sub></sub> | This study       |
| <i>Klebsiella pneumoniae</i> | KPPR1 <sub>ev</sub>                                             | KPPR1 carrying empty pACYC184 plasmid                                                                   | This study       |
| <i>Klebsiella pneumoniae</i> | KPPR1 - $\Delta$ <i>gmhB</i> <sub>ev</sub>                      | $\Delta$ <i>gmhB</i> carrying empty pACYC184 plasmid                                                    | This study       |
| <i>Klebsiella pneumoniae</i> | KPPR1 - $\Delta$ <i>rfaH</i>                                    | KPPR1 with kanamycin resistance gene from pKD4 replacing the <i>rfaH</i> open reading frame             | 26060277         |
| <i>Klebsiella pneumoniae</i> | KPPR1 - $\Delta$ <i>galU</i>                                    | KPPR1 with kanamycin resistance gene from pKD4 replacing the <i>galU</i> open reading frame             | 33720976         |
| <i>Klebsiella pneumoniae</i> | KPPR1 - $\Delta$ 4727                                           | KPPR1 with kanamycin resistance gene from pKD4 replacing the 4727 open reading frame                    | This study       |
| <i>Klebsiella pneumoniae</i> | KPPR1 - $\Delta$ 2040                                           | KPPR1 with kanamycin resistance gene from pKD4 replacing the 2040 open reading frame                    | This study       |
| <i>Klebsiella pneumoniae</i> | KPPR1 - $\Delta$ 4483                                           | KPPR1 with kanamycin resistance gene from pKD4 replacing the 4483 open reading frame                    | This study       |

|                              |                         |                                                                                                                                                                                    |            |
|------------------------------|-------------------------|------------------------------------------------------------------------------------------------------------------------------------------------------------------------------------|------------|
| <i>Klebsiella pneumoniae</i> | KPPR1 - $\Delta ulaA$   | KPPR1 with kanamycin resistance gene from pKD4 replacing the <i>ulaA</i> open reading frame                                                                                        | This study |
| <i>Klebsiella pneumoniae</i> | KPPR1 - $\Delta prlC$   | KPPR1 with kanamycin resistance gene from pKD4 replacing the <i>prlC</i> open reading frame                                                                                        | This study |
| <i>Escherichia coli</i>      | CFT073                  | -                                                                                                                                                                                  | 2182540    |
| <i>Escherichia coli</i>      | CFT073:tn:: <i>gmhB</i> | CFT073 with a Mariner transposon insertion within the open reading frame of <i>gmhB</i>                                                                                            | This study |
| <i>Citrobacter freundii</i>  | UMH14                   | -                                                                                                                                                                                  | 30087402   |
| <i>Citrobacter freundii</i>  | UMH14: $\Delta gmhB$    | UMH14 with kanamycin resistance gene from pKD4 replacing the <i>gmhB</i> open reading frame                                                                                        | This study |
|                              |                         |                                                                                                                                                                                    |            |
|                              | Plasmids                |                                                                                                                                                                                    |            |
|                              | pKD46                   | Red recombinase expression plasmid of phage $\lambda$                                                                                                                              | 10829079   |
|                              | pKD4                    | Template plasmid carrying kanamycin resistance cassette                                                                                                                            | 10829079   |
|                              | pACYC184                | Cloning vector conferring chloromphenicol resistance harboring restriction enzyme cut sites                                                                                        |            |
|                              | pACYCgmhB               | pACYC184 digested with BamHI and HindIII with 1,860bp KPPR1 region harboring <i>gmhB</i> open reading frames and predicted native promoter ligated into cut site by Gibson cloning | This study |

**Supplemental Table 3. Primers used in this study.**

| Primer Name     | Primer Sequence (5'-3')                                                                    |
|-----------------|--------------------------------------------------------------------------------------------|
| 2040_flank_F    | CTGACGAATGGACAACG                                                                          |
| 2040_flank_R    | AAATCCTTGGCATGAGC                                                                          |
| 2040_internal_F | TAATATCCTGCACATAGGC                                                                        |
| 2040_internal_R | TTGGGATGATGGTTTCG                                                                          |
| 2040_pKD4_P1    | TTAGTGTTTTTCCGGTTGCGACGCATATCGATGGTTACTGCCGCAACGATAATGATGCCTTTA<br>AGTGTAGGCTGGAGCTGCTTC   |
| 2040_pKD4_P2    | ATGAGTAATATGAAATTAACGGCGGCTCCGGCCAGCGAGGGTTCCTCCTTCTTCGCTAATTTG<br>CGATGGGAATTAGCCATGGTCC  |
| 4483_flank_F    | GTTGGCGCACATTGATGG                                                                         |
| 4483_flank_R    | AGCACTTTCGACAGAGATATGG                                                                     |
| 4483_internal_F | CGGTGTTGGGTGATATAGCG                                                                       |
| 4483_internal_R | ATAGCCGAAAGCGTCATGG                                                                        |
| 4483_pKD4_P1    | GTGGTCGCGCTGGCCCTCGGCCTGATGGCGCAGGGGGCCATGGCGAAAACGCTGAATGTGG<br>TAAGGTGTAGGCTGGAGCTGCTTC  |
| 4483_pKD4_P2    | CCTGTTACTTCATGCTGTTAGCGATAAGCTCAACGTTGTGACGCATCATTTTGACGTA ACTATC<br>GATGGGAATTAGCCATGGTCC |
| 4727_flank_F    | GAAATCACTCGCATTTTCCTTCC                                                                    |
| 4727_flank_R    | TGATCCATGATGTGTCATCCC                                                                      |
| 4727_internal_F | AGGATGACGTGAACGAAACC                                                                       |

|                 |                                                                                            |
|-----------------|--------------------------------------------------------------------------------------------|
| 4727_internal_R | CAGATGCTCTGGAAGATAAGCC                                                                     |
| 4727_pKD4_P1    | ATGAAACTAAAGACCACATTGTTTCGGCAATGTTTATCAGTTTAAGGATGTAAAAGAGGTGCTGG<br>CGTGTAGGCTGGAGCTGCTTC |
| 4727_pKD4_P2    | CCCCGCGTCATCAGAAGAACAGTGACGGATCGCCCCGCCGTTTGGTCAGGCGACCATTGCC<br>ATAATGGGAATTAGCCATGGTCC   |
| gmhB_flank_F    | TATAGGGAGCTCTCCGGGAA                                                                       |
| gmhB_flank_R    | GCGGAAACATGCGATACTAGC                                                                      |
| gmhB_internal_F | CTCTCCGGGAATGACAAGC                                                                        |
| gmhB_internal_R | TGAAACGCTGACCGAATGG                                                                        |
| gmhB_pKD4_P1    | TTATTTTTGCTGCTTTTTAATCGCCGCCGGCAGCTCTGCCAGGCTATTTAGCACCCAATCCGCC<br>GGTGTAGGCTGGAGCTGCTTC  |
| gmhB_pKD4_P2    | AGCAAACCGGTGGCAAAGTCAGTACCCGCAATTTTTCTCGACCGTGACGGCACTATTAATGTC<br>GAATGGGAATTAGCCATGGTCC  |
| prlC_flank_F    | GCCCGTCATTGAAATTCCC                                                                        |
| prlC_flank_R    | TTCATCAATTAAGCAGATCTTCACG                                                                  |
| prlC_internal_F | GCTTCTATCTCGACCTGTATGC                                                                     |
| prlC_internal_R | CTGCTCCGGTTTGTACTCC                                                                        |
| prlC_pKD4_P1    | ATGACCAATCCATTATTGACGCCTTTCTCCCTGCCGCCTTTTTCTGCGATCAAACCAGAGCACG<br>TGTGTAGGCTGGAGCTGCTTC  |
| prlC_pKD4_P2    | TCAGCCTTTGATCCCGTAATGCTCCAGCATCGCGTCCAGCTGCGGCTCGCGCCCGCGGAAGC<br>GTTATGGGAATTAGCCATGGTCC  |
| ulaA_flank_F    | GTTACCACATACAGCCAGAATACG                                                                   |

|                        |                                                                                           |
|------------------------|-------------------------------------------------------------------------------------------|
| ulaA_flank_R           | CGAGAAATGCTGAGCGTAAGG                                                                     |
| ulaA_internal_F        | TTCAACCATGCCCATCACC                                                                       |
| ulaA_internal_R        | CAGGCTGGCTCAATATCTTCC                                                                     |
| ulaA_pKD4_P1           | GCCCGTTACCACATACAGCCAGAATACGTACGGTCATAATCAGAACTCCTTATTGGGCAGAGG<br>CCGTGTAGGCTGGAGCTGCTTC |
| ulaA_pKD4_P2           | TATGGCAATCCTCTACAACATCTTTACCGTTTTCTTTAATCAGGTGATGACCAATGCCCCGCTG<br>CATGGGAATTAGCCATGGTCC |
| gmhB_pACYC_s<br>eq_F   | GCCGAAACAAGCGCTCATGAG                                                                     |
| gmhB_pACYC_s<br>eq_R   | TCAGAGCAAGAGATTACGCGC                                                                     |
| gmhB_pKD4_UM<br>H14_P1 | GTGGCAAAGTCTGTACCCGCAATTTTTCTCGACCGTGACGGTGTAGGCTGGAGCTGCTTC                              |
| gmhB_pKD4_UM<br>H14_P2 | TGCATTTTTGTTTCAACCGCTCACCTTTTACCCATAACGCATATGAATATCCTCCTTAGT                              |
| gmhB_UMH14_s<br>eq_F   | CTGTCAGGTACGGTCGAAGCC                                                                     |
| gmhB_UMH14_s<br>eq_R   | CGGCTGTTTGTGTGAAGTGATTC                                                                   |

**Supplemental Dataset 1.** Selection Strategy for candidate dissemination factors.

Contains two tabs: "Supplementary Data" contains number of insertions, insertion counts, ratio and q-value for each gene and each comparison used for selection. "Selection" describes the criteria for considering a gene to be significantly associated with lung dissemination.
